# Supplementary material
Source: PubMed Central journal article supplement (PMC6381839)
Supplement: NIHMS1012650-supplement-SI.pdf [file NIHMS1012650-supplement-SI.pdf]

Supplementary Information for “Structural and spectroscopic characterization of a product Schiff-base intermediate in the reaction of the quinoprotein glycine oxidase, GoxA”

*Running Title: CTQ-product Schiff-base*

*Dante Avalos<sup>1†</sup>, Sinan Sabuncu<sup>2†</sup>, Kyle J. Mamounis<sup>3</sup>, Victor L. Davidson<sup>3</sup>, Pierre Moënne-Loccoz<sup>2</sup> and Erik T. Yukl<sup>1\*</sup>*

<sup>1</sup>Department of Chemistry and Biochemistry, New Mexico State University, Las Cruces, NM 88003.

<sup>2</sup>Department of Biochemistry and Molecular Biology, School of Medicine, Oregon Health and Science University, Portland, OR 97239

<sup>3</sup>Burnett School of Biomedical Sciences, College of Medicine, University of Central Florida, Orlando, FL 32827

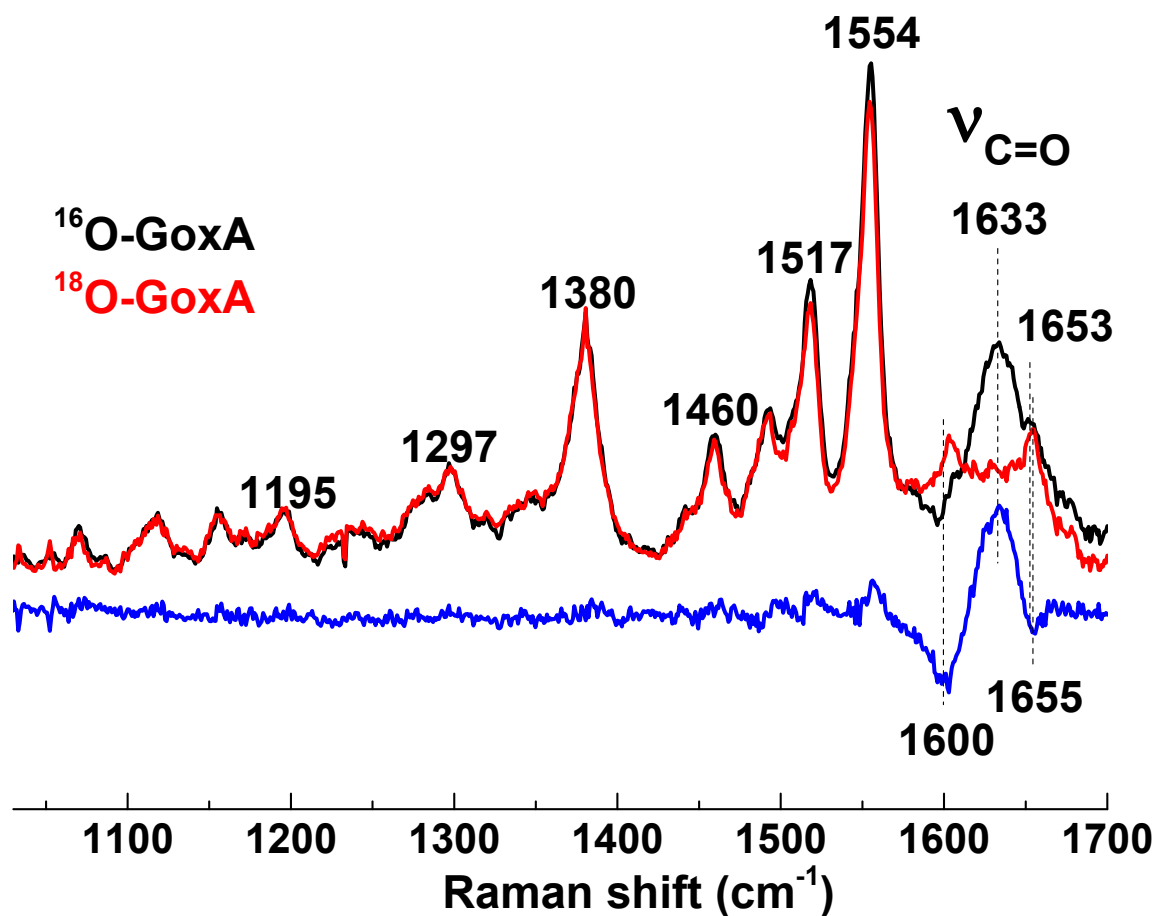

**Figure S1.** RR spectra of redox cycled PIgOx A obtained with 407 nm excitation at room temperature; the final protein concentration was  $\sim 500 \mu\text{M}$  in unlabeled (black) or  $^{18}\text{O}$ -water (red) after multiple turnover cycles with 5 mM Gly in 50 mM KPi pH 7.5 under a constant  $\text{O}_2$ -saturated headspace.

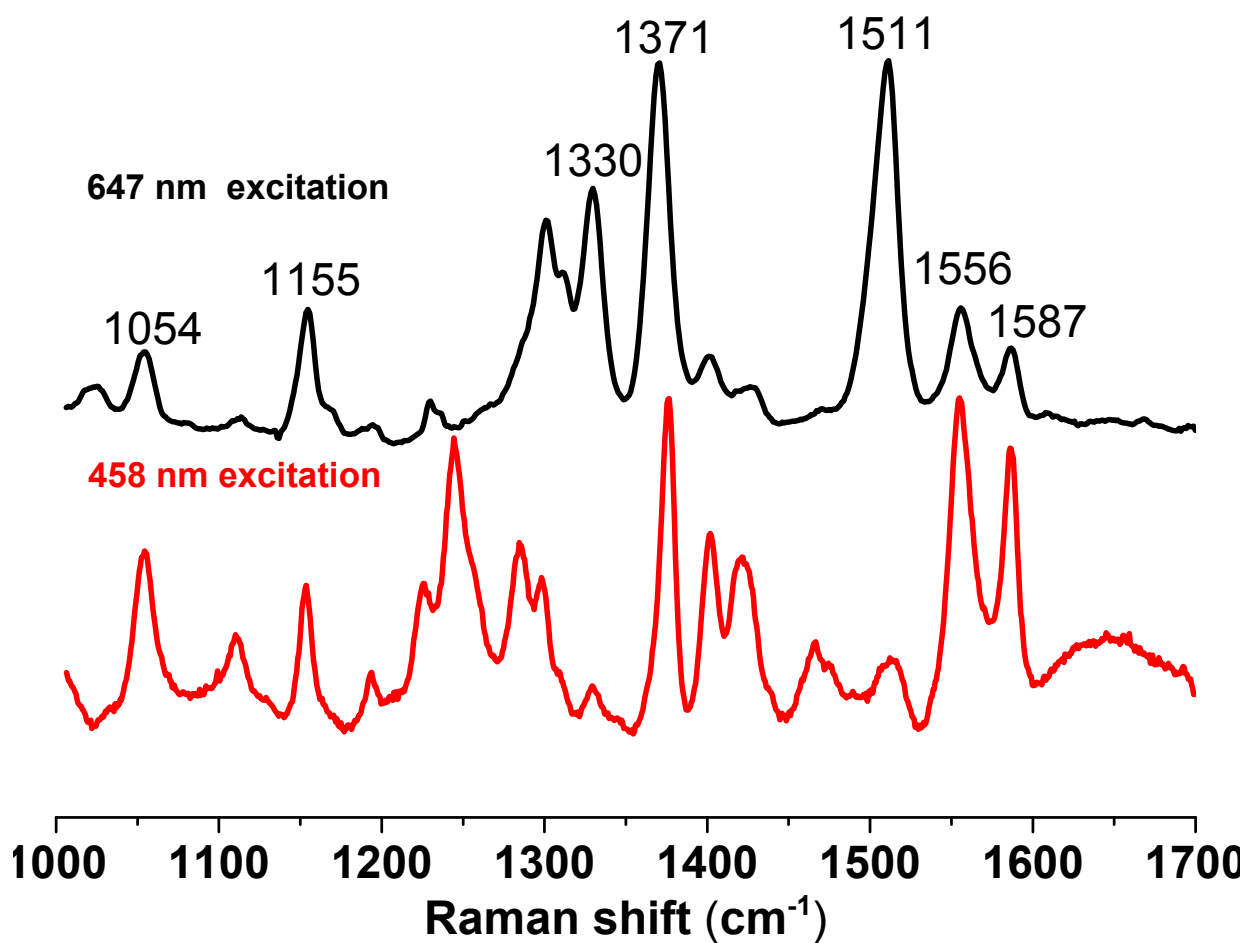

**Figure S2.** RR spectra of Gly-GoxA with 647nm excitation (black) and with 458nm excitation (red) at room temperature. The final protein concentration was  $\sim 550 \mu\text{M}$  in 50 mM KPi pH 7.5. The spectra are normalized with respect to the 1371-cm<sup>-1</sup> band.

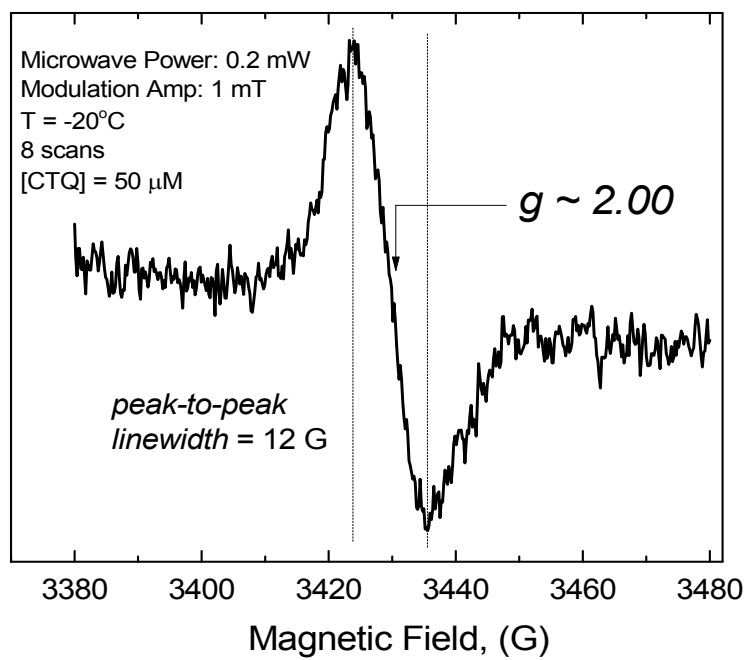

**Figure S3.** Residual organic radical signal observed in the EPR spectra of Gly-GoxA at  $-20\text{ }^{\circ}\text{C}$ .
